# Supplementary material
Source: PubMed Central journal article supplement (PMC5818198)

# **RNA polymerase II is released from the DNA template during transcription-coupled repair in mammalian cells**

Yi-Ying Chiou, Jinchuan Hu, Aziz Sancar, and Christopher P. Selby

## SUPPLEMENTAL INFORMATION

### **Supplemental Figure 1. Location of DNA repair in genes larger than 100 kb.**

Values plotted in text Figure 5A (top) represent the average of two independent experiments. Supplemental Figure 1 shows the results of each of the two experiments (Rep1 and Rep2).

**Supplemental Figure 2. Distribution of elongating RNAPII.** Values plotted in the top two panels of text Figure 6 represent the average of two independent experiments. Supplemental Figure 2 shows the results of each of the two experiments

Supplementary Figure 1: XR-seq plot

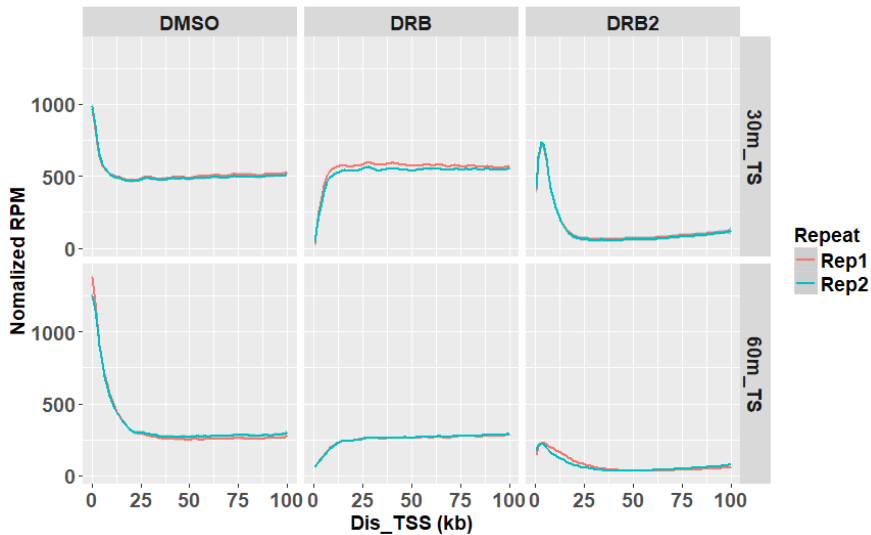

Supplementary Figure 2: NET-seq plot

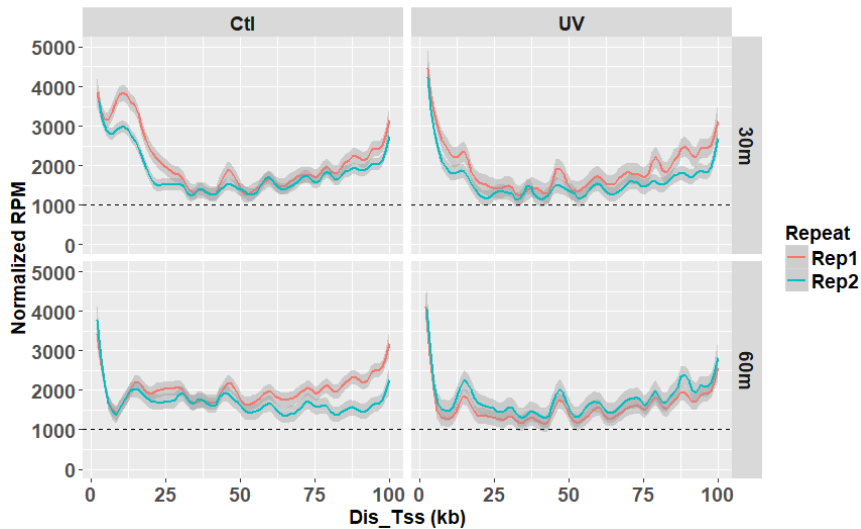

Supplement: supp_RA117.000971_133926_1_supp_40003_p14w2x.pdf [file supp_RA117.000971_133926_1_supp_40003_p14w2x.pdf]
